# Supplementary material
Source: PubMed Central journal article supplement (PMC6328763)
Supplement: AEM.02141-18-s0001.pdf [file AEM.02141-18-s0001.pdf]

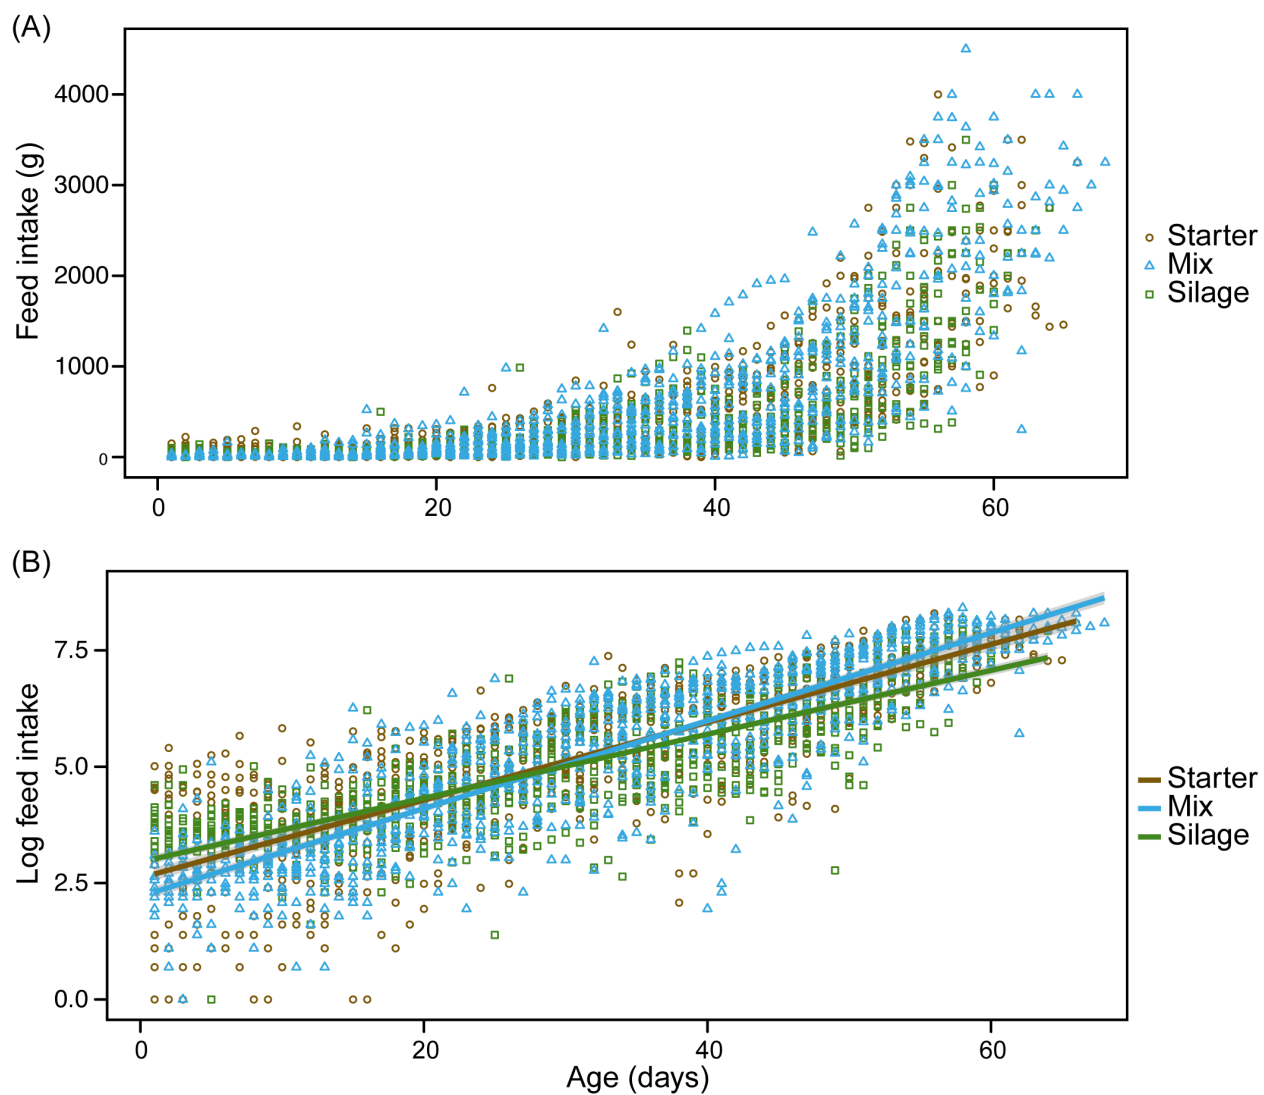

**Figure S1. Calf supplement intake.** Supplement intake (g/day) by diet from birth to weaning. A) Raw supplement intake. B) Log-transformed supplement intake to fit a linear model. Calf starter (brown, circle), corn silage (green, square), mixture (blue, triangle).

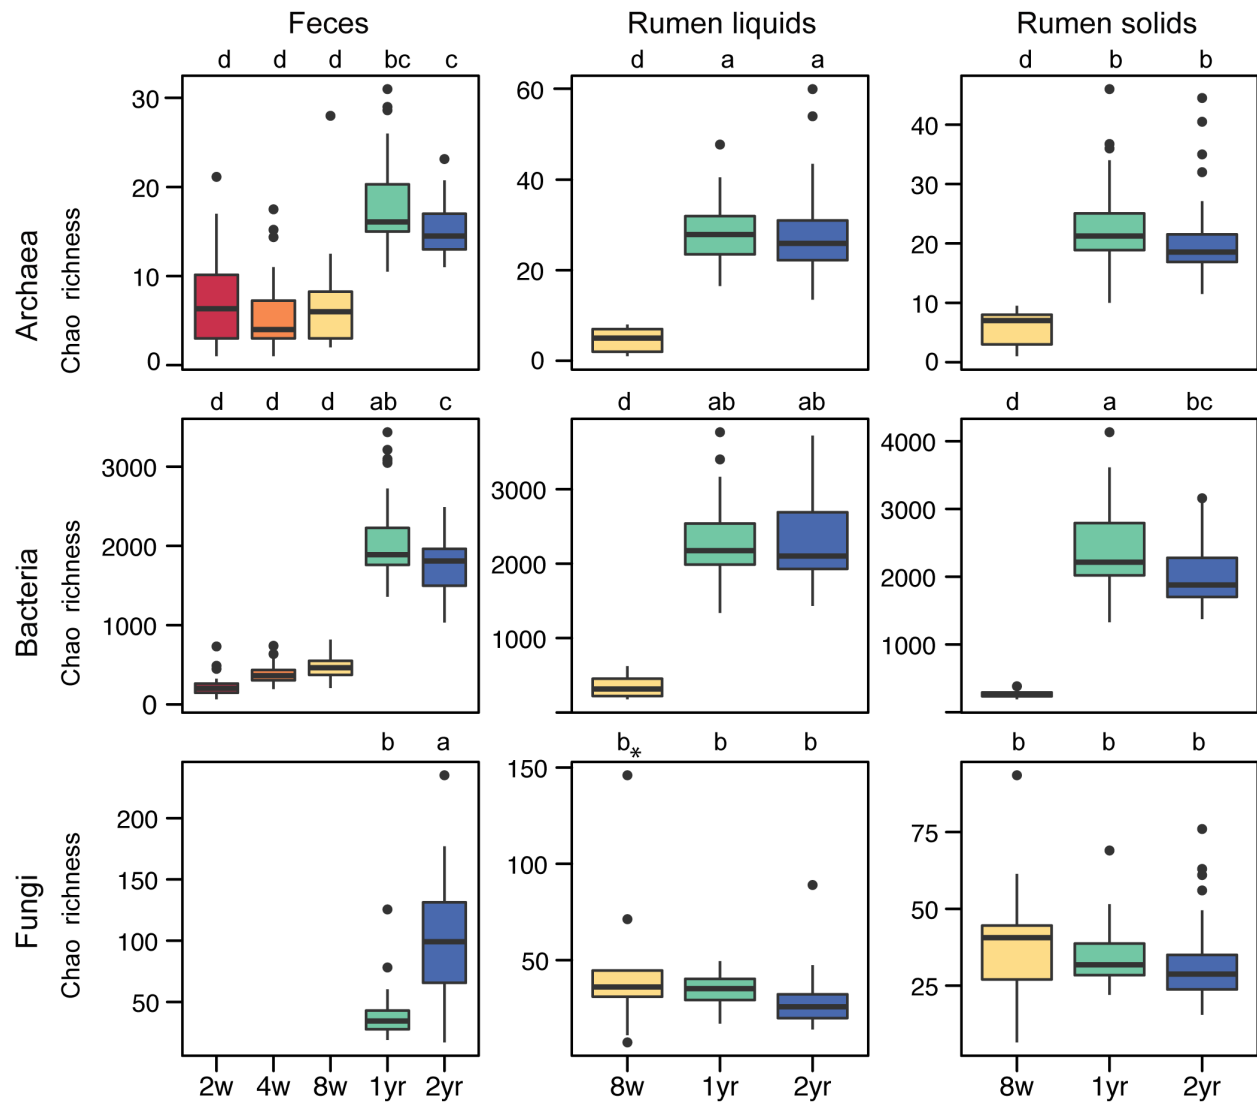

**Figure S2. Richness of the microbiota in cows raised on different diets.** Chao's richness of archaeal, bacterial, and fungal communities in feces as well as rumen liquids and solids. Boxes are colored by animal age for 2-week (red), 4-week (orange), 8-week (yellow), 1-year (green), and 2-year (blue). Ages with significantly different richness across each amplicon are indicated by different letters. Asterisks denote groups containing significant diet differences (TukeyHSD,  $P < 0.05$ , Table S3).

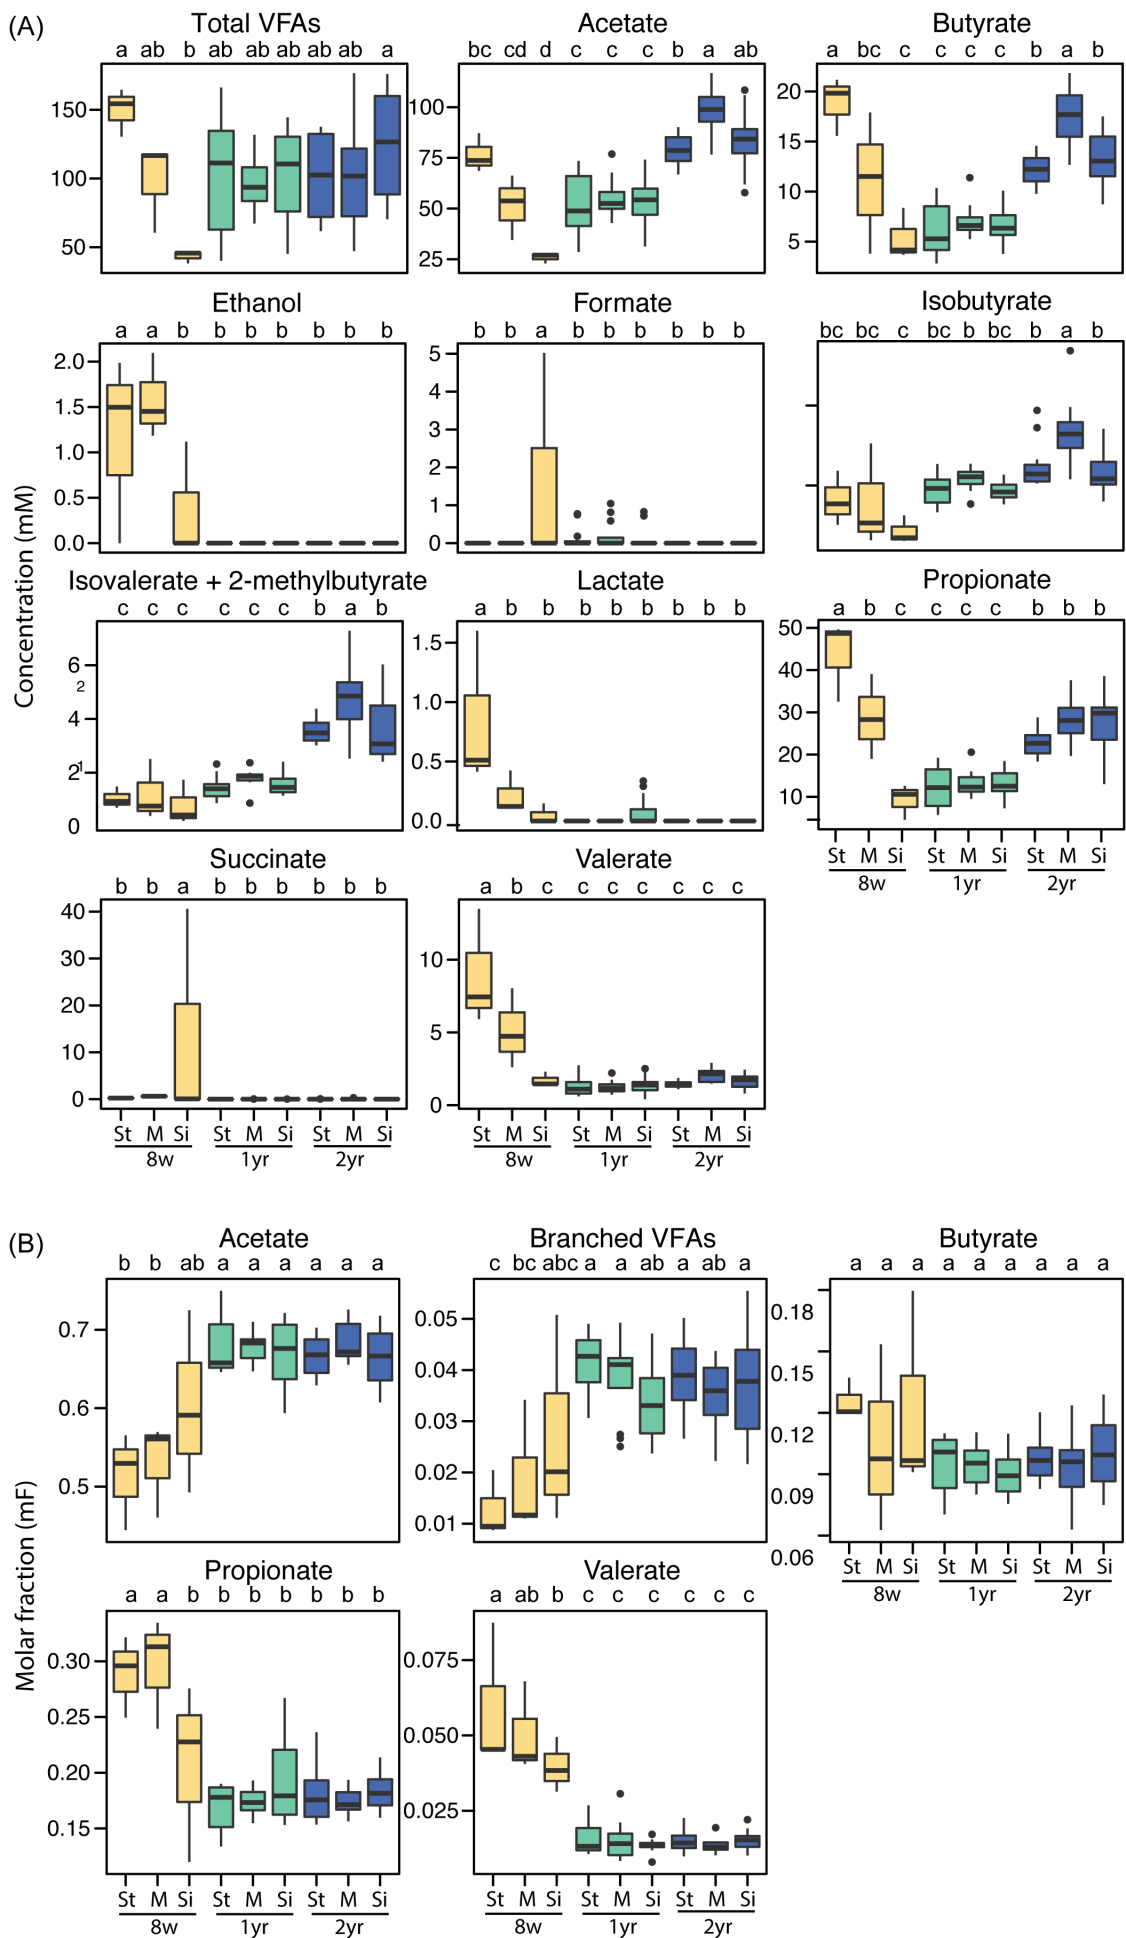

**Figure S3. Short chain organic acid (SCOA) profiles.** (A) SCOA concentrations and (B) VFA molar fractions in rumen liquids at 8 weeks, 1 year, and 2 years. Boxes are colored by animal age for 8-weeks (yellow), 1-year (green), and 2-years (blue). Letters within each plot denote significantly different groups (TukeyHSD, Table S3). Calf starter (St), corn silage (Si), mixed diet (M).

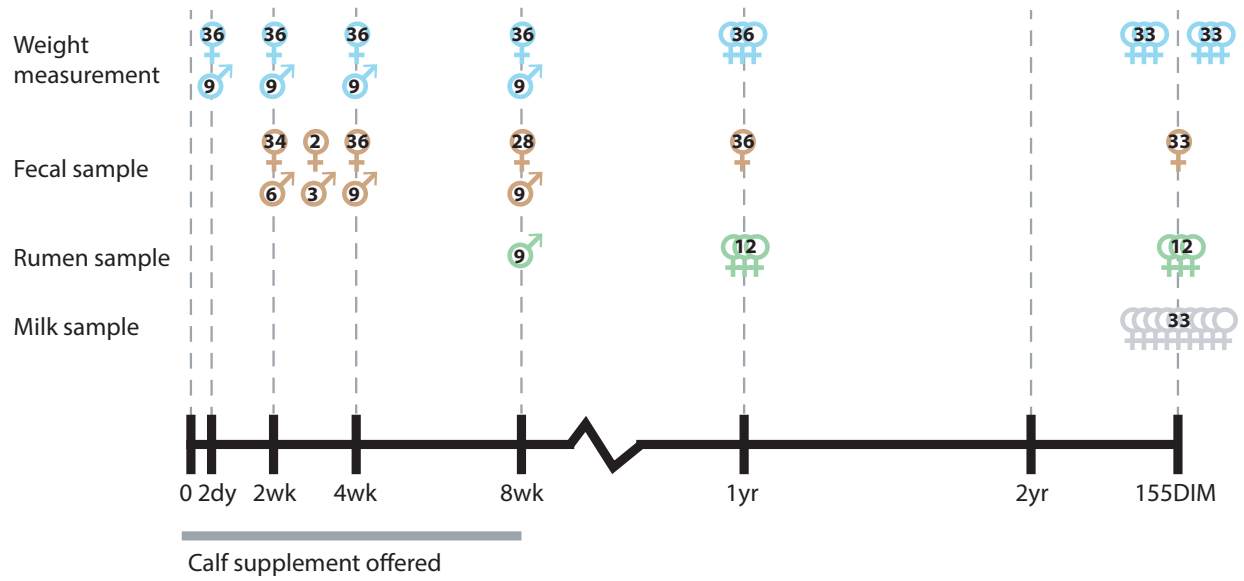

**Figure S4. Experimental design** indicating timing of fecal, rumen, and milk sampling as well as weight measurements. Male calves (♂) were sacrificed at weaning (8 weeks) while female calves (♀) were retained through first lactation. Numbers indicate animals sampled at each time point and overlapping symbols indicate samples or measurements taken on consecutive days. DIM: days in milk

Table S1a. Nutritional analysis of feed components by % dry matter (DM)

|                           | CP    | Starch | Sugar (ESC) | Fat (EE) | Ash  | ADF  | NDF   | Ca   | Mg   | P    | K    | S    | Lasalocid (antibiotic, g/ton) |
|---------------------------|-------|--------|-------------|----------|------|------|-------|------|------|------|------|------|-------------------------------|
| Calf starter              | 22.68 | 42.30  | 1.75        | 2.82     | 6.52 | 5.18 | 11.06 | 1.02 | 0.22 | 0.59 | 1.13 | 0.28 | 60                            |
| Corn silage               | 7.2   | 33.3   | -           | 3.4      | -    | 23.9 | 39    | 0.23 | -    | 0.23 | 0.7  | -    | 0                             |
| Alfalfa haylage           | 22.5  | 3.1    | -           | 2.8      | -    | 30.1 | 37.5  | 1.3  | -    | 0.40 | 2.83 | -    | 0                             |
| Cracked corn              | 8.1   | 73.7   | -           | 4.3      | -    | 3.5  | 9.7   | 0.02 | -    | 0.29 | 0.44 | -    | 0                             |
| Heifer vitamins           | 0     | 0.01   | -           | 0        | -    | 0    | 0     | 25.4 | -    | 1.13 | 1.14 | -    | 0                             |
| Grass silage base         | 14.5  | 3.6    | -           | 3        | -    | 37   | 52    | 0.83 | -    | 0.36 | 2.9  | -    | 0                             |
| Wheat straw               | 3.8   | -      | -           | 1.7      | -    | 54.3 | 80.4  | 0.27 | -    | 0.08 | 1.4  | -    | 0                             |
| Heifer base               | 0     | 0.008  | -           | 0        | -    | 0    | 0     | 25.9 | -    | 1.11 | 1.13 | -    | 0                             |
| Corn, high moisture shell | 8.2   | 69.4   | -           | 2.9      | -    | 2.6  | 7.0   | 0.03 | -    | 0.33 | 0.44 | -    | 0                             |
| Corn, grade shell         | 9.0   | 68.0   | -           | 4.2      | -    | 3.5  | 9.7   | 0.03 | -    | 0.29 | 0.44 | -    | 0                             |

Values are averages across the sampling period as crops vary slightly by year. CP: crude protein, ESC: ethanol soluble carbohydrates, EE: ether extraction, ADF: acid detergent fiber, NDF: neutral detergent fiber

Table S1b. Feed components offered at different ages (%DM)

|                           | 0-8 weeks Diet A | 0-8 weeks Diet B | 0-8 weeks Diet C | 2-3 months* | 3-5 months | 6-10 months | 11-14 months | 15+ months | Lactating |
|---------------------------|------------------|------------------|------------------|-------------|------------|-------------|--------------|------------|-----------|
| Calf starter              | 100              | 0                | 50               | 17.3 - 100  | 17.3       | 0           | 0            | 0          | 0         |
| Corn silage               | 0                | 100              | 50               | 0 - 22.2    | 22.2       | 30.7        | 25.7         | 20.6       | 28.8      |
| Alfalfa haylage           | 0                | 0                |                  | 0 - 44.5    | 44.5       | 32.1        | 38.6         | 39.0       | 28.8      |
| Cracked corn              | 0                | 0                |                  | 0 - 14.8    | 14.8       | 8.9         | 0            | 0          | 0         |
| Heifer vitamins           | 0                | 0                |                  | 0 - 1.2     | 1.2        | 1.5         | 1.4          | 0          | 0         |
| Grass silage base         | 0                | 0                |                  | 0           | 0          | 16.1        | 17.2         | 21.7       | 0         |
| Wheat straw               | 0                | 0                |                  | 0           | 0          | 0           | 14.3         | 17.4       | 0         |
| Heifer base               | 0                | 0                |                  | 0           | 0          | 0           | 0            | 1.3        | 0         |
| Dry distillers grains     | 0                | 0                |                  | 0           | 0          | 10.7        | 2.9          | 0          | 4.2       |
| Corn, high moisture shell | 0                | 0                |                  | 0           | 0          | 0           | 0            | 0          | 16.3      |
| Corn, grade shell         | 0                | 0                |                  | 0           | 0          | 0           | 0            | 0          | 5.5       |
| Soybeans                  | 0                | 0                |                  | 0           | 0          | 0           | 0            | 0          | 7.4       |
| Canola meal               | 0                | 0                |                  | 0           | 0          | 0           | 0            | 0          | 6.5       |
| USDA minerals             | 0                | 0                |                  | 0           | 0          | 0           | 0            | 0          | 2.5       |

\*This time period was transitional with a gradual daily change from the 8 week to the 3 month diet

Table S8. Calculating milk production and overall efficiency in dairy cows.

| Cow  | DMI (kg/d) | SCC (x1000) | Milk loss (kg/d) <sup>a</sup> | Mastitis (MJ/d) <sup>b</sup> | DCC | Preg (MJ/d) <sup>c</sup> | Wt1 (kg) | Wt2 (kg) | Dys wts | Δwt (MJ/d) <sup>d</sup> | Maint (MJ/d) <sup>e</sup> | ECM (kg/d) | Milk (MJ/d) <sup>f</sup> | Total energy output (MJ/d) <sup>g</sup> | MPE (MJ milk/kg DMI) | Efficiency (total output MJ/kg DMI) |
|------|------------|-------------|-------------------------------|------------------------------|-----|--------------------------|----------|----------|---------|-------------------------|---------------------------|------------|--------------------------|-----------------------------------------|----------------------|-------------------------------------|
| 5015 | 22.30      | 12.73       | 0.00                          | 0.00                         | 38  | 0                        | 575      | 583      | 10      | 16.77                   | 39.49                     | 45.19      | 129.71                   | 185.97                                  | 5.82                 | 8.34                                |
| 5017 | 19.17      | 6.69        | 0.00                          | 0.00                         | 8   | 0                        | 531      | 523      | 10      | -16.77                  | 36.80                     | 34.61      | 99.35                    | 119.38                                  | 5.18                 | 6.23                                |
| 5019 | 19.82      | 63.81       | 0.00                          | 0.00                         | 75  | 0                        | 615      | 610      | 10      | -10.48                  | 41.20                     | 46.78      | 134.28                   | 165.00                                  | 6.77                 | 8.32                                |
| 5020 | 34.44      | 59.19       | 0.00                          | 0.00                         | 75  | 0                        | 669      | 675      | 10      | 12.58                   | 44.17                     | 43.86      | 125.90                   | 182.65                                  | 3.66                 | 5.30                                |
| 5022 | 20.88      | 105.82      | 0.68                          | 1.95                         | 58  | 0                        | 593      | 623      | 10      | 62.89                   | 40.98                     | 32.22      | 92.49                    | 198.31                                  | 4.43                 | 9.50                                |
| 5026 | 24.42      | 145.58      | 1.36                          | 3.91                         | 73  | 0                        | 576      | 592      | 10      | 33.54                   | 39.76                     | 43.82      | 125.78                   | 202.99                                  | 5.15                 | 8.31                                |
| 5027 | 24.52      | 113.93      | 0.68                          | 1.95                         | 43  | 0                        | 622      | 622      | 10      | 0.00                    | 41.70                     | 42.42      | 121.76                   | 165.41                                  | 4.97                 | 6.75                                |
| 5028 | 17.15      | 168.27      | 1.36                          | 3.91                         | 76  | 0                        | 611      | 609      | 10      | -4.19                   | 41.07                     | 35.19      | 101.01                   | 141.80                                  | 5.89                 | 8.27                                |
| 5031 | 29.68      | 319.30      | 2.04                          | 5.86                         | 1   | 0                        | 565      | 576      | 8       | 28.82                   | 39.07                     | 31.30      | 89.83                    | 163.58                                  | 3.03                 | 5.51                                |
| 5032 | 38.19      | 25.85       | 0.00                          | 0.00                         | 0   | 0                        | 621      | 628      | 10      | 14.67                   | 41.83                     | 35.63      | 102.27                   | 158.77                                  | 2.68                 | 4.16                                |
| 5034 | 28.65      | 21.72       | 0.00                          | 0.00                         | 41  | 0                        | 576      | 599      | 10      | 48.21                   | 39.94                     | 36.26      | 104.09                   | 192.24                                  | 3.63                 | 6.71                                |
| 5035 | 18.27      | 283.69      | 2.04                          | 5.86                         | 0   | 0                        | 581      | 587      | 10      | 12.58                   | 39.76                     | 37.73      | 108.29                   | 166.49                                  | 5.93                 | 9.11                                |
| 5037 | 17.76      | 39.20       | 0.00                          | 0.00                         | 72  | 0                        | 574      | 573      | 10      | -2.10                   | 39.22                     | 44.47      | 127.65                   | 164.77                                  | 7.19                 | 9.28                                |
| 5038 | 21.06      | 152.58      | 1.36                          | 3.91                         | 0   | 0                        | 582      | 609      | 10      | 56.60                   | 40.35                     | 30.17      | 86.59                    | 187.45                                  | 4.11                 | 8.90                                |
| 5039 | 34.96      | 271.12      | 1.36                          | 3.91                         | 72  | 0                        | 701      | 699      | 10      | -4.19                   | 45.55                     | 49.03      | 140.75                   | 186.02                                  | 4.03                 | 5.32                                |
| 5041 | 27.79      | 42.04       | 0.00                          | 0.00                         | 8   | 0                        | 668      | 684      | 10      | 33.54                   | 44.38                     | 40.01      | 114.85                   | 192.77                                  | 4.13                 | 6.94                                |
| 5042 | 30.68      | 45.36       | 0.00                          | 0.00                         | 73  | 0                        | 609      | 623      | 10      | 29.35                   | 41.37                     | 38.46      | 110.38                   | 181.10                                  | 3.60                 | 5.90                                |
| 5044 | 32.56      | 30.59       | 0.00                          | 0.00                         | 82  | 0                        | 674      | 672      | 10      | -4.19                   | 44.22                     | 58.42      | 167.69                   | 207.72                                  | 5.15                 | 6.38                                |
| 5045 | 37.93      | 343.50      | 2.04                          | 5.86                         | 77  | 0                        | 667      | 656      | 10      | -23.06                  | 43.66                     | 38.58      | 110.74                   | 137.20                                  | 2.92                 | 3.62                                |
| 5046 | 19.07      | 875.58      | 2.72                          | 7.82                         | 76  | 0                        | 559      | 560      | 10      | 2.10                    | 38.50                     | 45.00      | 129.17                   | 177.59                                  | 6.77                 | 9.31                                |
| 5047 | 32.86      | 246.71      | 1.36                          | 3.91                         | 73  | 0                        | 699      | 680      | 10      | -39.83                  | 45.05                     | 40.96      | 117.57                   | 126.70                                  | 3.58                 | 3.86                                |
| 5048 | 17.25      | 271.48      | 1.36                          | 3.91                         | 77  | 0                        | 523      | 529      | 10      | 12.58                   | 36.77                     | 30.95      | 88.84                    | 142.10                                  | 5.15                 | 8.24                                |
| 5049 | 15.30      | 975.67      | 2.72                          | 7.82                         | 21  | 0                        | 610      | 640      | 10      | 62.89                   | 41.83                     | 42.98      | 123.37                   | 235.91                                  | 8.06                 | 15.42                               |
| 5050 | 18.22      | 2682        | 4.08                          | 11.73                        | 0   | 0                        | 595      | 603      | 10      | 16.77                   | 40.54                     | 36.14      | 103.75                   | 172.79                                  | 5.69                 | 9.48                                |
| 5051 | 31.68      | 1658        | 3.40                          | 9.77                         | 75  | 0                        | 574      | 579      | 10      | 10.48                   | 39.38                     | 34.06      | 97.75                    | 157.38                                  | 3.09                 | 4.97                                |
| 5052 | 29.57      | 56.52       | 0.00                          | 0.00                         | 74  | 0                        | 662      | 653      | 10      | -18.87                  | 43.48                     | 41.97      | 120.47                   | 145.08                                  | 4.07                 | 4.91                                |

|      |       |        |      |      |    |   |     |     |    |       |       |       |        |        |      |       |
|------|-------|--------|------|------|----|---|-----|-----|----|-------|-------|-------|--------|--------|------|-------|
| 5053 | 26.99 | 30.33  | 0.00 | 0.00 | 0  | 0 | 547 | 546 | 10 | -2.10 | 37.82 | 39.67 | 113.86 | 149.58 | 4.22 | 5.54  |
| 5054 | 15.69 | 159.48 | 1.36 | 3.91 | 75 | 0 | 547 | 550 | 10 | 6.29  | 37.94 | 34.35 | 98.59  | 146.73 | 6.29 | 9.35  |
| 5057 | 14.98 | 212.96 | 1.36 | 3.91 | 0  | 0 | 619 | 617 | 7  | -5.99 | 41.49 | 39.68 | 113.89 | 153.30 | 7.60 | 10.23 |
| 5058 | 29.61 | 18.07  | 0.00 | 0.00 | 0  | 0 | 593 | 606 | 10 | 27.25 | 40.54 | 35.53 | 101.99 | 169.78 | 3.44 | 5.73  |
| 5059 | 36.77 | 29.81  | 0.00 | 0.00 | 42 | 0 | 621 | 634 | 10 | 27.25 | 41.98 | 48.00 | 137.78 | 207.01 | 3.75 | 5.63  |
| 5062 | 35.21 | 42.31  | 0.00 | 0.00 | 36 | 0 | 567 | 566 | 10 | -2.10 | 38.86 | 40.33 | 115.76 | 152.52 | 3.29 | 4.33  |
| 5063 | 30.32 | 227.85 | 1.36 | 3.91 | 73 | 0 | 612 | 619 | 10 | 14.67 | 41.36 | 49.53 | 142.16 | 202.10 | 4.69 | 6.67  |

Dry matter intake (DMI), somatic cell count (SCC), days carrying calf (DCC), pregnancy (preg), energy corrected milk (ECM), milk production efficiency (MPE)

<sup>a</sup> Calculated from SCC based on (1).

<sup>b</sup> milk loss kg/d \* 4.184 MJ/Mcal \* 0.68605 Mcal/kg (energy content of milk (1))

<sup>c</sup> 0 if DCC < 190 (2)

<sup>d</sup> (wt2 - wt1)/dys \* 4.184 MJ/Mcal \* 5.01 Mcal/kg (mean value energy content of wt at a body condition score (BCS) of 3.5)

<sup>e</sup> mean wt<sup>0.75</sup> \* 4.184 MJ/Mcal \* 0.08 (maintenance factor (2))

<sup>f</sup> ECM kg/d \* 4.184 MJ/Mcal \* 0.68605 Mcal/kg (energy content of milk (1))

<sup>g</sup> mastitis + preg + Δwt + maintenance + milk (all MJ/d)

## **REFERENCES**

1. Dairy Records Management Systems. 2013. The DHI Glossary Dairy Records Management Systems. Raleigh, NC.
2. 2001. Nutrient requirements of dairy cattle. National Academy Press, Washington D.C.
